# Supplementary material
Source: PubMed Central journal article supplement (PMC3582297)
Supplement: cn300148r_si_001.pdf [file cn300148r_si_001.pdf]

# Supporting Information

for

## **Comparative modeling of the human monoamine transporters – similarities in substrate binding**

**Heidi Koldso,<sup>¶</sup> Anja B. Christiansen,<sup>§</sup> Steffen Sinning,<sup>§</sup> and Birgit Schiøtt<sup>¶\*</sup>**

From the <sup>¶</sup> Center for Insoluble Protein Structures (*inSPIN*) and Interdisciplinary Nanoscience Center (*iNANO*), Department of Chemistry, Aarhus University, Langelandsgade 140, 8000 Aarhus C, Denmark and <sup>§</sup> Laboratory of Molecular Neurobiology, Centre for Psychiatric Research, Aarhus University Hospital, Skovagervej 2, 8240 Risskov, Denmark

The supporting Information includes tables of the statistics for homology modeling of hSERT, hDAT and hNET in Tables S1-S3. Table S4-S6 reports the data for all poses for the induced fit docking calculations.

**Table S1:** Statistics from the model building of hSERT. The Molpdf which should be as low as possible is reported. Furthermore the percentage in the favorable, additionally allowed, generously allowed and disallowed regions are listed. The overall best model with  $\chi_1$  of Asp98 *gauche* was chosen and is here indicated in italic and bold. The models shaded gray are the ones with  $\chi_1$  of Asp98 *anti*

| hSERT Model | Molpdf     | Ramachandran (%)        | Cavity size <sup>1</sup> (Å <sup>3</sup> ) | Asp98 $\chi_1$ (°) |
|-------------|------------|-------------------------|--------------------------------------------|--------------------|
| 1           | 356        | 91.5/6.4/1.7/0.4        | 45.1                                       | 310.9              |
| 2           | 514        | 90.5/7.2/2.1/0.2        | 114.7                                      | 199.1              |
| <b>3</b>    | <b>310</b> | <b>89.5/8.5/1.0/1.0</b> | <b>114.2</b>                               | <b>58.9</b>        |
| 4           | 308        | 90.1/8.1/1.0/0.8        | 114.7                                      | 198.5              |
| 5           | 1985       | 91.1/6.8/0.4/1.7        | 87.0                                       | 61.0               |
| 6           | 597        | 89.5/8.3/1.2/1.0        | 116.2                                      | 198.9              |
| 7           | 2386       | 89.7/7.6/1.7/1.0        | 100.4                                      | 59.1               |
| 8           | 378        | 91.3/6.6/1.2/0.8        | 115.7                                      | 197.4              |
| 9           | 709        | 90.5/7.2/1.4/0.8        | 96.8                                       | 61.1               |
| 10          | 341        | 89.9/7.9/1.2/1.0        | 65.5                                       | 203.8              |
| 11          | 322        | 90.3/7.6/1.2/0.8        | 113.2                                      | 60.6               |
| 12          | 773        | 90.7/7.2/1.4/0.6        | 129.0                                      | 197.1              |
| 13          | 389        | 88.2/9.9/0.8/1.0        | 100.4                                      | 193.8              |
| 14          | 360        | 90.5/7.6/0.8/1.0        | 94.2                                       | 60.9               |
| 15          | 3414       | 89.7/7.4/1.2/1.7        | 88.6                                       | 62.1               |
| 16          | 1731       | 89.5/8.3/1.0/1.2        | 78.3                                       | 61.8               |
| 17          | 332        | 89.0/8.1/1.4/1.4        | 113.2                                      | 59.5               |
| 18          | 527        | 90.7/7.0/1.4/0.8        | 123.9                                      | 192.2              |
| 19          | 339        | 90.3/8.5/0.8/0.4        | 93.7                                       | 193.1              |
| 20          | 1794       | 89.3/8.7/1.4/0.6        | 89.1                                       | 196.2              |

<sup>1</sup> MVD molecular surface probe size 1.2 Å. 25 cavities each run

**Table S2:** Statistics from the model building of hDAT. The Molpdf which should be as low as possible is reported. Furthermore the percentage in the favorable, additionally allowed, generously allowed and disallowed regions are listed. The overall best model with  $\chi_1$  of Asp79 *gauche* was chosen and is here indicated in italic and bold. The models shaded gray are the ones with  $\chi_1$  of Asp79 *anti*

| hDAT Model | Molpdf     | Ramachandran (%)        | Cavity size <sup>2</sup> (Å <sup>3</sup> ) | Asp79 $\chi_1$ (°) |
|------------|------------|-------------------------|--------------------------------------------|--------------------|
| 1          | 399        | 91.2/6.8/1.6/0.4        | 85.0                                       | 310.8              |
| 2          | 358        | 90.8/7.8/1.0/0.4        | 103.4                                      | 58.9               |
| 3          | 372        | 90.1/7.4/1.4/1.0        | 109.6                                      | 62.9               |
| 4          | 1801       | 90.1/7.0/1.6/1.2        | 99.8                                       | 193.5              |
| 5          | <b>396</b> | <b>90.8/7.8/0.8/0.6</b> | <b>127.5</b>                               | <b>59.9</b>        |
| 6          | 1869       | 88.9/9.0/1.4/0.6        | 118.8                                      | 196.5              |
| 7          | 374        | 90.8/7.8/0.8/0.6        | 140.3                                      | 196.7              |
| 8          | 377        | 92.6/6.2/0.8/0.4        | 103.9                                      | 61.9               |
| 9          | 724        | 89.1/8.2/1.8/0.8        | 136.7                                      | 164.6              |
| 10         | 2339       | 90.6/8.0/1.0/0.4        | 113.7                                      | 59.0               |
| 11         | 355        | 89.5/8.4/1.2/0.8        | 125.4                                      | 60.0               |
| 12         | 360        | 90.1/8.0/1.6/0.2        | 106.5                                      | 313.0              |
| 13         | 437        | 89.7/8.2/1.2/0.8        | 141.3                                      | 190.5              |
| 14         | 415        | 88.7/9.7/1.0/0.6        | 113.7                                      | 61.0               |
| 15         | 429        | 90.3/7.6/1.4/0.6        | 156.7                                      | 196.6              |
| 16         | 1506       | 89.3/8.6/1.6/0.4        | 131.6                                      | 59.8               |
| 17         | 333        | 92.0/5.7/1.6/0.6        | 167.4                                      | 197.7              |
| 18         | 654        | 90.3/6.6/2.7/0.4        | 155.1                                      | 196.5              |
| 19         | 380        | 91.8/6.0/1.2/1.0        | 131.1                                      | 194.4              |
| 20         | 497        | 89.3/8.4/1.6/0.6        | 113.7                                      | 314.3              |

<sup>2</sup> MVD molecular surface probe size 1.2 Å. 25 cavities each run

**Table S3:** Statistics from the model building of hNET. The Molpdf, which should be as low as possible, is reported. Furthermore the percentage in the favorable, additionally allowed, generously allowed and disallowed regions are listed. The overall best model with  $\chi_1$  of Asp75 *gauche* was chosen and is here indicated in italic and bold. The models shaded gray are the ones with  $\chi_1$  of Asp75 *anti*

| hNET model | Molpdf     | Ramachandran (%)        | Cavity size <sup>3</sup> (Å <sup>3</sup> ) | Asp75 $\chi_1$ (°) |
|------------|------------|-------------------------|--------------------------------------------|--------------------|
| 1          | 372        | 90.3/7.7/1.6/0.4        | 108.0                                      | 61.6               |
| 2          | 471        | 90.7/7.7/1.2/0.4        | 121.9                                      | 61.0               |
| 3          | 405        | 89.7/8.5/1.4/0.4        | 129.0                                      | 197.8              |
| 4          | 1376       | 89.3/7.4/1.4/1.8        | 123.9                                      | 60.8               |
| 5          | 535        | 90.9/7.3/1.0/0.8        | 134.7                                      | 196.3              |
| <b>6</b>   | <b>444</b> | <b>89.7/8.1/1.4/0.8</b> | <b>131.6</b>                               | <b>59.6</b>        |
| 7          | 1145       | 87.7/9.9/1.6/0.8        | 128.5                                      | 60.7               |
| 8          | 500        | 89.9/7.7/1.6/0.8        | 136.7                                      | 196.8              |
| 9          | 634        | 87.9/7.5/1.8/1.0        | 113.2                                      | 61.7               |
| 10         | 359        | 91.1/7.5/0.8/0.6        | 101.9                                      | 316.9              |
| 11         | 1594       | 90.1/8.5/1.0/0.4        | 129.0                                      | 60.5               |
| 12         | 515        | 90.1/7.7/1.6/0.6        | 127.5                                      | 195.1              |
| 13         | 541        | 89.7/7.9/1.8/0.6        | 116.7                                      | 194.0              |
| 14         | 2321       | 90.1/8.1/1.4/0.4        | 113.2                                      | 61.3               |
| 15         | 650        | 90.1/6.9/2.2/0.8        | 146.9                                      | 199.8              |
| 16         | 894        | 89.5/8.3/1.8/0.4        | 103.4                                      | 57.3               |
| 17         | 474        | 90.3/7.9/1.4/0.4        | 121.9                                      | 61.8               |
| 18         | 569        | 90.1/7.7/1.6/0.6        | 105.5                                      | 57.1               |
| 19         | 524        | 90.1/7.1/1.6/1.2        | 127.5                                      | 61.9               |
| 20         | 634        | 89.9/8.1/1.2/0.8        | 127.5                                      | 59.3               |

<sup>3</sup> MVD molecular surface probe size 1.2 Å. 25 cavities each run

**Table S4:** Computed energies, distances and angles for all poses of 5-HT in hSERT. The mean value (Mean) and standard deviation (Stdv) are calculated

| Cluster     | Method | Scorings Function | Emodel<br>(kcal/mol) | GlideScore<br>(kcal/mol) | Distance<br>Asp98(O $\delta$ )-N <sup>+</sup> (Å) |
|-------------|--------|-------------------|----------------------|--------------------------|---------------------------------------------------|
| 5HT-0       | IFD    | SPXP              | -58.9                | -8.1                     | 2.66                                              |
| 5HT-0       | IFD    | SPXP              | -59.3                | -7.9                     | 2.75                                              |
| 5HT-0       | IFD    | SPXP              | -54.0                | -7.5                     | 2.63                                              |
| 5HT-0       | IFD    | SPXP              | -56.2                | -6.6                     | 3.03                                              |
| 5HT-0       | IFD    | SPXP              | -55.4                | -6.3                     | 3.07                                              |
| <b>Mean</b> |        |                   | <b>-59.3</b>         | <b>-8.1</b>              | <b>2.63</b>                                       |
| <b>Stdv</b> |        |                   | <b>2.3</b>           | <b>0.8</b>               | <b>0.21</b>                                       |
| 5HT-1       | IFD    | SPXP              | -45.1                | -8.2                     | 2.49                                              |
| 5HT-1       | IFD    | SPXP              | -64.5                | -8.1                     | 2.96                                              |
| 5HT-1       | IFD    | SPXP              | -57.7                | -7.9                     | 2.85                                              |
| 5HT-1       | IFD    | SPXP              | -69.6                | -7.9                     | 2.97                                              |
| 5HT-1       | IFD    | SPXP              | -59.1                | -7.9                     | 2.75                                              |
| 5HT-1       | IFD    | SPXP              | -61.4                | -7.9                     | 2.80                                              |
| 5HT-1       | IFD    | SPXP              | -67.4                | -7.8                     | 2.93                                              |
| 5HT-1       | IFD    | SPXP              | -57.1                | -7.6                     | 2.55                                              |
| 5HT-1       | IFD    | SPXP              | -56.8                | -7.6                     | 4.11                                              |
| 5HT-1       | IFD    | SPXP              | -68.7                | -7.6                     | 4.63                                              |
| 5HT-1       | IFD    | SPXP              | -58.5                | -7.5                     | 4.81                                              |
| 5HT-1       | IFD    | SPXP              | -62.7                | -7.5                     | 3.09                                              |
| 5HT-1       | IFD    | SPXP              | -54.1                | -7.5                     | 2.82                                              |
| 5HT-1       | IFD    | SPXP              | -63.5                | -7.4                     | 4.01                                              |
| 5HT-1       | IFD    | SPXP              | -57.2                | -7.4                     | 3.25                                              |
| 5HT-1       | IFD    | SPXP              | -63.9                | -7.3                     | 2.99                                              |
| 5HT-1       | IFD    | SPXP              | -57.9                | -7.2                     | 3.06                                              |
| 5HT-1       | IFD    | SPXP              | -46.9                | -7.1                     | 4.72                                              |
| 5HT-1       | IFD    | SPXP              | -53.0                | -7.1                     | 3.03                                              |
| 5HT-1       | IFD    | SPXP              | -62.2                | -6.9                     | 3.16                                              |
| 5HT-1       | IFD    | SPXP              | -59.1                | -6.9                     | 3.02                                              |
| 5HT-1       | IFD    | SPXP              | -57.2                | -6.9                     | 3.30                                              |
| 5HT-1       | IFD    | SPXP              | -60.6                | -6.9                     | 4.56                                              |
| 5HT-1       | IFD    | SPXP              | -53.3                | -6.8                     | 4.34                                              |
| 5HT-1       | IFD    | SPXP              | -51.1                | -6.8                     | 2.88                                              |
| 5HT-1       | IFD    | SPXP              | -55.0                | -6.5                     | 4.52                                              |
| 5HT-1       | IFD    | SPXP              | -42.6                | -6.3                     | 4.04                                              |
| 5HT-1       | IFD    | SPXP              | -58.3                | -6.2                     | 3.26                                              |
| 5HT-1       | IFD    | SPXP              | -52.3                | -6.2                     | 5.98                                              |
| 5HT-1       | IFD    | SPXP              | -50.9                | -6.1                     | 3.33                                              |
| 5HT-1       | IFD    | SPXP              | -55.5                | -5.5                     | 4.94                                              |
| 5HT-1       | IFD    | SPXP              | -49.7                | -5.0                     | 5.04                                              |
| <b>Mean</b> |        |                   | <b>-57.3</b>         | <b>-7.1</b>              | <b>3.60</b>                                       |
| <b>Stdv</b> |        |                   | <b>6.5</b>           | <b>0.7</b>               | <b>0.90</b>                                       |
| 5HT-2       | IFD    | SPXP              | -62.8                | -8.8                     | 2.59                                              |
| 5HT-2       | IFD    | SPXP              | -64.1                | -8.4                     | 3.22                                              |
| 5HT-2       | IFD    | SPXP              | -56.4                | -8.1                     | 2.51                                              |
| 5HT-2       | IFD    | SPXP              | -63.8                | -7.9                     | 3.11                                              |
| 5HT-2       | IFD    | SPXP              | -61.7                | -7.7                     | 2.97                                              |
| 5HT-2       | IFD    | SPXP              | -56.2                | -7.7                     | 2.90                                              |

|             |     |      |              |             |             |
|-------------|-----|------|--------------|-------------|-------------|
| 5HT-2       | IFD | SPXP | -68.5        | -7.6        | 2.79        |
| 5HT-2       | IFD | SPXP | -61.0        | -7.6        | 2.55        |
| 5HT-2       | IFD | SPXP | -57.8        | -7.6        | 2.93        |
| 5HT-2       | IFD | SPXP | -52.3        | -7.6        | 3.23        |
| 5HT-2       | IFD | SPXP | -62.7        | -7.5        | 2.89        |
| 5HT-2       | IFD | SPXP | -61.3        | -7.5        | 3.19        |
| 5HT-2       | IFD | SPXP | -44.4        | -7.4        | 2.77        |
| 5HT-2       | IFD | SPXP | -56.3        | -7.4        | 2.92        |
| 5HT-2       | IFD | SPXP | -54.2        | -7.3        | 2.83        |
| 5HT-2       | IFD | SPXP | -53.5        | -7.3        | 2.82        |
| 5HT-2       | IFD | SPXP | -63.9        | -7.2        | 2.78        |
| 5HT-2       | IFD | SPXP | -61.2        | -7.0        | 2.41        |
| 5HT-2       | IFD | SPXP | -53.1        | -6.3        | 4.32        |
| 5HT-2       | IFD | SPXP | -63.9        | -6.3        | 3.30        |
| 5HT-2       | IFD | SPXP | -50.1        | -6.1        | 4.36        |
| 5HT-2       | IFD | SPXP | -62.6        | -5.2        | 2.85        |
| <b>Mean</b> |     |      | <b>-58.7</b> | <b>-7.3</b> | <b>3.01</b> |
| <b>Stdv</b> |     |      | <b>5.8</b>   | <b>0.8</b>  | <b>0.49</b> |
| 5HT-3       | IFD | SPXP | -64.9        | -8.1        | 2.80        |
| 5HT-3       | IFD | SPXP | -57.7        | -7.7        | 3.84        |
| 5HT-3       | IFD | SPXP | -56.9        | -7.7        | 4.03        |
| 5HT-3       | IFD | SPXP | -58.0        | -6.7        | 3.99        |
| 5HT-3       | IFD | SPXP | -54.7        | -6.2        | 3.46        |
| <b>Mean</b> |     |      | <b>-58.4</b> | <b>-7.3</b> | <b>3.62</b> |
| <b>Stdv</b> |     |      | <b>3.9</b>   | <b>0.8</b>  | <b>0.51</b> |

**Table S5:** Computed energies, distances and angles for all poses of DA in hDAT. The mean value (mean) and standard deviation (stdv) is calculated

| Cluster     | Method | Scorings Function | Emodel<br>(kcal/mol) | GlideScore<br>(kcal/mol) | Distance<br>Asp79(O $\delta$ )-N <sup>+</sup> (Å) |
|-------------|--------|-------------------|----------------------|--------------------------|---------------------------------------------------|
| DA-0        | IFD    | SPXP              | -46.4                | -8.9                     | 2.89                                              |
| DA-0        | IFD    | SPXP              | -47.0                | -8.9                     | 2.67                                              |
| DA-0        | IFD    | SPXP              | -39.8                | -8.3                     | 2.80                                              |
| DA-0        | IFD    | SPXP              | -46.3                | -8.3                     | 2.51                                              |
| DA-0        | IFD    | SPXP              | -51.0                | -8.1                     | 2.85                                              |
| DA-0        | IFD    | SPXP              | -44.6                | -8.1                     | 2.68                                              |
| DA-0        | IFD    | SPXP              | -33.3                | -7.7                     | 2.83                                              |
| DA-0        | IFD    | SPXP              | -50.8                | -7.4                     | 2.94                                              |
| DA-0        | IFD    | SPXP              | -52.7                | -7.3                     | 2.89                                              |
| <b>Mean</b> |        |                   | <b>-45.8</b>         | <b>-8.1</b>              | <b>2.78</b>                                       |
| <b>Stdv</b> |        |                   | <b>6.1</b>           | <b>0.6</b>               | <b>0.14</b>                                       |
| DA-1        | IFD    | SPXP              | -43.2                | -9.2                     | 2.64                                              |
| DA-1        | IFD    | SPXP              | -47.2                | -8.9                     | 2.92                                              |
| DA-1        | IFD    | SPXP              | -50.7                | -8.8                     | 2.77                                              |
| DA-1        | IFD    | SPXP              | -55.1                | -8.7                     | 2.61                                              |
| DA-1        | IFD    | SPXP              | -46.1                | -8.7                     | 2.73                                              |
| DA-1        | IFD    | SPXP              | -51.9                | -8.7                     | 2.68                                              |
| DA-1        | IFD    | SPXP              | -50.4                | -8.7                     | 2.76                                              |
| DA-1        | IFD    | SPXP              | -54.7                | -8.7                     | 2.78                                              |
| DA-1        | IFD    | SPXP              | -48.4                | -8.6                     | 2.75                                              |
| DA-1        | IFD    | SPXP              | -52.7                | -8.6                     | 2.70                                              |
| DA-1        | IFD    | SPXP              | -47.8                | -8.6                     | 2.68                                              |
| DA-1        | IFD    | SPXP              | -51.3                | -8.6                     | 2.69                                              |
| DA-1        | IFD    | SPXP              | -47.1                | -8.5                     | 2.70                                              |
| DA-1        | IFD    | SPXP              | -51.3                | -8.5                     | 2.76                                              |
| DA-1        | IFD    | SPXP              | -45.5                | -8.5                     | 2.59                                              |
| DA-1        | IFD    | SPXP              | -43.4                | -8.4                     | 2.71                                              |
| DA-1        | IFD    | SPXP              | -50.3                | -8.4                     | 2.65                                              |
| DA-1        | IFD    | SPXP              | -46.0                | -8.4                     | 3.18                                              |
| DA-1        | IFD    | SPXP              | -50.1                | -8.4                     | 2.74                                              |
| DA-1        | IFD    | SPXP              | -53.5                | -8.4                     | 2.37                                              |
| DA-1        | IFD    | SPXP              | -45.1                | -8.4                     | 2.58                                              |
| DA-1        | IFD    | SPXP              | -50.0                | -8.3                     | 2.57                                              |
| DA-1        | IFD    | SPXP              | -51.9                | -8.3                     | 2.74                                              |
| DA-1        | IFD    | SPXP              | -48.7                | -8.3                     | 2.66                                              |
| DA-1        | IFD    | SPXP              | -49.2                | -8.3                     | 2.67                                              |
| DA-1        | IFD    | SPXP              | -47.8                | -8.2                     | 3.21                                              |
| DA-1        | IFD    | SPXP              | -51.0                | -8.2                     | 2.78                                              |
| DA-1        | IFD    | SPXP              | -51.5                | -8.2                     | 2.60                                              |
| DA-1        | IFD    | SPXP              | -54.3                | -8.1                     | 2.87                                              |
| DA-1        | IFD    | SPXP              | -48.5                | -8.1                     | 3.08                                              |
| DA-1        | IFD    | SPXP              | -50.5                | -8.1                     | 2.64                                              |
| DA-1        | IFD    | SPXP              | -52.5                | -8.1                     | 2.59                                              |
| DA-1        | IFD    | SPXP              | -46.8                | -8.0                     | 2.51                                              |
| DA-1        | IFD    | SPXP              | -47.7                | -7.9                     | 2.63                                              |
| DA-1        | IFD    | SPXP              | -45.8                | -7.9                     | 2.80                                              |
| DA-1        | IFD    | SPXP              | -45.8                | -7.8                     | 2.54                                              |
| DA-1        | IFD    | SPXP              | -52.0                | -7.7                     | 2.87                                              |

|             |     |      |              |             |             |
|-------------|-----|------|--------------|-------------|-------------|
| DA-1        | IFD | SPXP | -49.2        | -7.7        | 2.68        |
| DA-1        | IFD | SPXP | -50.0        | -7.6        | 2.95        |
| DA-1        | IFD | SPXP | -48.0        | -7.5        | 3.38        |
| DA-1        | IFD | SPXP | -44.4        | -7.3        | 2.71        |
| DA-1        | IFD | SPXP | -51.8        | -7.1        | 3.01        |
| <b>Mean</b> |     |      | <b>-49.3</b> | <b>-8.3</b> | <b>2.75</b> |
| <b>Stdv</b> |     |      | <b>3.0</b>   | <b>0.4</b>  | <b>0.20</b> |
| DA-2        | IFD | SPXP | -45.5        | -9.2        | 2.59        |
| DA-2        | IFD | SPXP | -50.0        | -9.1        | 2.64        |
| DA-2        | IFD | SPXP | -49.9        | -9.1        | 2.65        |
| DA-2        | IFD | SPXP | -49.6        | -9.0        | 2.96        |
| DA-2        | IFD | SPXP | -51.5        | -9.0        | 2.48        |
| DA-2        | IFD | SPXP | -56.4        | -8.9        | 2.87        |
| DA-2        | IFD | SPXP | -43.4        | -8.8        | 2.98        |
| DA-2        | IFD | SPXP | -54.2        | -8.3        | 2.58        |
| DA-2        | IFD | SPXP | -48.2        | -8.1        | 3.07        |
| DA-2        | IFD | SPXP | -52.9        | -8.0        | 3.00        |
| DA-2        | IFD | SPXP | -51.2        | -7.9        | 2.82        |
| <b>Mean</b> |     |      | <b>-50.3</b> | <b>-8.7</b> | <b>2.79</b> |
| <b>Stdv</b> |     |      | <b>3.7</b>   | <b>0.5</b>  | <b>0.20</b> |
| DA-3        | IFD | SPXP | -55.3        | -9.2        | 2.74        |
| DA-3        | IFD | SPXP | -56.7        | -9.1        | 2.81        |
| DA-3        | IFD | SPXP | -46.8        | -9.0        | 2.80        |
| DA-3        | IFD | SPXP | -54.2        | -9.0        | 2.77        |
| DA-3        | IFD | SPXP | -57.8        | -8.6        | 2.98        |
| DA-3        | IFD | SPXP | -50.5        | -8.4        | 2.88        |
| DA-3        | IFD | SPXP | -58.0        | -8.1        | 3.09        |
| DA-3        | IFD | SPXP | -42.6        | -8.1        | 2.86        |
| DA-3        | IFD | SPXP | -50.8        | -7.7        | 2.96        |
| DA-3        | IFD | SPXP | -47.5        | -7.6        | 2.88        |
| DA-3        | IFD | SPXP | -56.0        | -7.6        | 3.14        |
| DA-3        | IFD | SPXP | -48.4        | -7.6        | 3.73        |
| <b>Mean</b> |     |      | <b>-52.1</b> | <b>-8.3</b> | <b>2.97</b> |
| <b>Stdv</b> |     |      | <b>5.0</b>   | <b>0.6</b>  | <b>0.27</b> |



**Table S6:** Computed energies, distances and angles for all poses of NE in hNET. The mean value (mean) and standard deviation (stdv) is calculated

| Cluster     | Method | Scorings Function | Emodel<br>(kcal/mol) | GlideScore<br>(kcal/mol) | Distance<br>Asp75(O $\delta$ )-N <sup>+</sup> (Å) |
|-------------|--------|-------------------|----------------------|--------------------------|---------------------------------------------------|
| NE-0        | IFD    | SPXP              | -48.3                | -9.2                     | 2.81                                              |
| NE-0        | IFD    | SPXP              | -52.6                | -8.5                     | 2.69                                              |
| NE-0        | IFD    | SPXP              | -58.3                | -8.2                     | 2.84                                              |
| NE-0        | IFD    | SPXP              | -59.4                | -7.5                     | 2.61                                              |
| NE-0        | IFD    | SPXP              | -51.0                | -6.9                     | 4.68                                              |
| NE-0        | IFD    | SPXP              | -54.1                | -6.9                     | 2.69                                              |
| <b>Mean</b> |        |                   | <b>-53.9</b>         | <b>-7.9</b>              | <b>3.05</b>                                       |
| <b>Stdv</b> |        |                   | <b>4.2</b>           | <b>0.9</b>               | <b>0.80</b>                                       |
| NE-1        | IFD    | SPXP              | -61.0                | -9.9                     | 2.64                                              |
| NE-1        | IFD    | SPXP              | -60.9                | -9.5                     | 2.85                                              |
| NE-1        | IFD    | SPXP              | -61.5                | -9.4                     | 2.70                                              |
| NE-1        | IFD    | SPXP              | -54.8                | -9.4                     | 2.91                                              |
| NE-1        | IFD    | SPXP              | -55.1                | -9.3                     | 2.74                                              |
| NE-1        | IFD    | SPXP              | -58.2                | -9.0                     | 2.66                                              |
| NE-1        | IFD    | SPXP              | -60.2                | -9.0                     | 2.60                                              |
| NE-1        | IFD    | SPXP              | -56.9                | -8.9                     | 2.70                                              |
| NE-1        | IFD    | SPXP              | -58.8                | -8.9                     | 2.74                                              |
| NE-1        | IFD    | SPXP              | -52.6                | -8.8                     | 2.77                                              |
| NE-1        | IFD    | SPXP              | -59.0                | -8.6                     | 2.94                                              |
| NE-1        | IFD    | SPXP              | -63.1                | -8.3                     | 2.70                                              |
| NE-1        | IFD    | SPXP              | -58.7                | -8.3                     | 2.57                                              |
| NE-1        | IFD    | SPXP              | -61.1                | -8.3                     | 2.71                                              |
| NE-1        | IFD    | SPXP              | -54.5                | -8.2                     | 2.98                                              |
| NE-1        | IFD    | SPXP              | -67.9                | -8.2                     | 2.50                                              |
| NE-1        | IFD    | SPXP              | -59.6                | -8.1                     | 2.56                                              |
| NE-1        | IFD    | SPXP              | -68.1                | -7.9                     | 2.67                                              |
| NE-1        | IFD    | SPXP              | -60.4                | -7.9                     | 3.07                                              |
| NE-1        | IFD    | SPXP              | -68.9                | -7.9                     | 2.57                                              |
| NE-1        | IFD    | SPXP              | -56.4                | -7.8                     | 2.61                                              |
| NE-1        | IFD    | SPXP              | -59.1                | -7.8                     | 2.57                                              |
| NE-1        | IFD    | SPXP              | -55.9                | -7.7                     | 2.66                                              |
| NE-1        | IFD    | SPXP              | -56.7                | -7.6                     | 2.58                                              |
| NE-1        | IFD    | SPXP              | -57.1                | -7.6                     | 3.50                                              |
| NE-1        | IFD    | SPXP              | -58.2                | -7.1                     | 3.22                                              |
| <b>Mean</b> |        |                   | <b>-59.4</b>         | <b>-8.4</b>              | <b>2.76</b>                                       |
| <b>Stdv</b> |        |                   | <b>4.1</b>           | <b>0.7</b>               | <b>0.23</b>                                       |
| NE-2        | IFD    | SPXP              | -60.1                | -9.8                     | 2.72                                              |
| NE-2        | IFD    | SPXP              | -62.3                | -9.8                     | 2.66                                              |
| NE-2        | IFD    | SPXP              | -64.0                | -9.4                     | 2.74                                              |
| NE-2        | IFD    | SPXP              | -57.8                | -9.2                     | 2.67                                              |
| NE-2        | IFD    | SPXP              | -60.3                | -9.2                     | 2.74                                              |
| NE-2        | IFD    | SPXP              | -62.5                | -9.2                     | 2.54                                              |
| NE-2        | IFD    | SPXP              | -60.2                | -9.0                     | 2.58                                              |
| NE-2        | IFD    | SPXP              | -58.1                | -9.0                     | 2.61                                              |
| NE-2        | IFD    | SPXP              | -62.3                | -9.0                     | 2.50                                              |
| NE-2        | IFD    | SPXP              | -61.0                | -9.0                     | 2.70                                              |
| NE-2        | IFD    | SPXP              | -59.6                | -9.0                     | 2.51                                              |

|             |     |      |              |             |             |
|-------------|-----|------|--------------|-------------|-------------|
| NE-2        | IFD | SPXP | -57.3        | -8.9        | 2.74        |
| NE-2        | IFD | SPXP | -57.0        | -8.9        | 2.68        |
| NE-2        | IFD | SPXP | -56.8        | -8.9        | 2.72        |
| NE-2        | IFD | SPXP | -62.1        | -8.9        | 2.84        |
| NE-2        | IFD | SPXP | -54.4        | -8.7        | 2.99        |
| NE-2        | IFD | SPXP | -59.0        | -8.7        | 2.73        |
| NE-2        | IFD | SPXP | -59.1        | -8.7        | 2.72        |
| NE-2        | IFD | SPXP | -58.0        | -8.7        | 3.04        |
| NE-2        | IFD | SPXP | -59.3        | -8.6        | 2.54        |
| NE-2        | IFD | SPXP | -55.9        | -8.6        | 2.72        |
| NE-2        | IFD | SPXP | -60.7        | -8.6        | 2.48        |
| NE-2        | IFD | SPXP | -65.9        | -8.5        | 2.70        |
| NE-2        | IFD | SPXP | -57.3        | -8.5        | 2.58        |
| NE-2        | IFD | SPXP | -50.6        | -8.5        | 2.83        |
| NE-2        | IFD | SPXP | -59.5        | -8.5        | 3.03        |
| NE-2        | IFD | SPXP | -43.8        | -8.4        | 2.68        |
| NE-2        | IFD | SPXP | -58.4        | -8.4        | 2.65        |
| NE-2        | IFD | SPXP | -66.0        | -8.3        | 2.74        |
| NE-2        | IFD | SPXP | -66.9        | -8.3        | 2.70        |
| NE-2        | IFD | SPXP | -68.1        | -8.3        | 2.62        |
| NE-2        | IFD | SPXP | -64.8        | -8.2        | 2.74        |
| NE-2        | IFD | SPXP | -60.7        | -8.2        | 4.10        |
| NE-2        | IFD | SPXP | -55.0        | -8.2        | 2.69        |
| NE-2        | IFD | SPXP | -55.1        | -8.1        | 2.55        |
| NE-2        | IFD | SPXP | -60.3        | -8.0        | 2.64        |
| NE-2        | IFD | SPXP | -50.0        | -7.9        | 3.24        |
| NE-2        | IFD | SPXP | -62.4        | -7.9        | 2.85        |
| NE-2        | IFD | SPXP | -52.8        | -7.8        | 2.67        |
| NE-2        | IFD | SPXP | -48.4        | -6.9        | 3.16        |
| <b>Mean</b> |     |      | <b>-58.8</b> | <b>-8.6</b> | <b>2.76</b> |
| <b>Stdv</b> |     |      | <b>5.0</b>   | <b>0.6</b>  | <b>0.27</b> |
| NE-3        | IFD | SPXP | -56.3        | -8.8        | 2.91        |
| NE-3        | IFD | SPXP | -51.1        | -8.6        | 3.28        |
| NE-3        | IFD | SPXP | -55.9        | -8.3        | 2.81        |
| NE-3        | IFD | SPXP | -65.6        | -7.4        | 2.80        |
| NE-3        | IFD | SPXP | -46.6        | -6.8        | 2.86        |
| NE-3        | IFD | SPXP | -57.2        | -6.6        | 2.80        |
| <b>Mean</b> |     |      | <b>-55.5</b> | <b>-7.7</b> | <b>2.91</b> |
| <b>Stdv</b> |     |      | <b>6.4</b>   | <b>1.0</b>  | <b>0.18</b> |
